# Supplementary material for: Electrospun Conductive Nanofiber Yarn for a Wearable Yarn Supercapacitor with High Volumetric Energy Density
Source: PubMed Central journal article supplement (PMC6356552; doi:10.3390/ma12020273), 2019-01-16

Supplementary Information

# Electrospun Conductive Nanofiber Yarn for a Wearable Yarn Supercapacitor with High Volumetric Energy Density

Xianqiang Sun <sup>1,2,\*</sup>, Jianxin He <sup>1,2,\*</sup>, Rong Qiang <sup>1,2</sup>, Nan Nan <sup>1,2</sup>, Xiaolu You <sup>1,2</sup>, Yuman Zhou <sup>1,2</sup>, Weili Shao <sup>1,2,\*</sup>, Fan Liu <sup>1,2</sup> and Rantong Liu <sup>1,2</sup>

<sup>1</sup> Henan Provincial Key Laboratory of Functional Textile Materials, Zhongyuan University of Technology, Zhengzhou 450007, China; liangjian791165@163.com (X.S.); qiangrong2009@126.com (R.Q.); 18037510635@163.com (N.N.); xiaoluyou0180@163.com (X.Y.); zhym\_work@163.com (Y.Z.); liufan\_a@hotmail.com (F.L.); ranton@126.com (R.L.)

<sup>2</sup> Collaborative Innovation Center of Textile and Garment Industry, Zhengzhou 450007, China

\* Correspondence: hejianxin771117@163.com (J.H.); weilishao@163.com (W.L.)

## Electrochemical performance calculation

For all solid state SCs, the volumetric specific capacity ( $C_v$ ) and mass specific capacity ( $C_m$ ) calculations for the entire device follow the following equation:

$$C_v = \frac{I \times \Delta t}{V \times \Delta U'} \quad (1)$$

$$C_m = \frac{I \times \Delta t}{m \times \Delta U'} \quad (2)$$

Here,  $I$ ,  $\Delta t$ , and  $\Delta U$  represent the discharge current, discharge time, and potential window, respectively.  $V$  represents the volume of the two yarns and the surrounding electrolyte of the entire device, and  $m$  represents the mass of effective active material for the capacitor electrode material.

According to the constant current charge–discharge curves at different current densities, the volumetric energy density  $E_v$  and the power energy density  $P_v$  can be calculated, following the following equation:

$$E_v = \frac{1}{2} \times C_v \times \Delta U^2, \quad (1)$$

$$P_v = E_v / \Delta t. \quad (1)$$

## Supplementary Figures

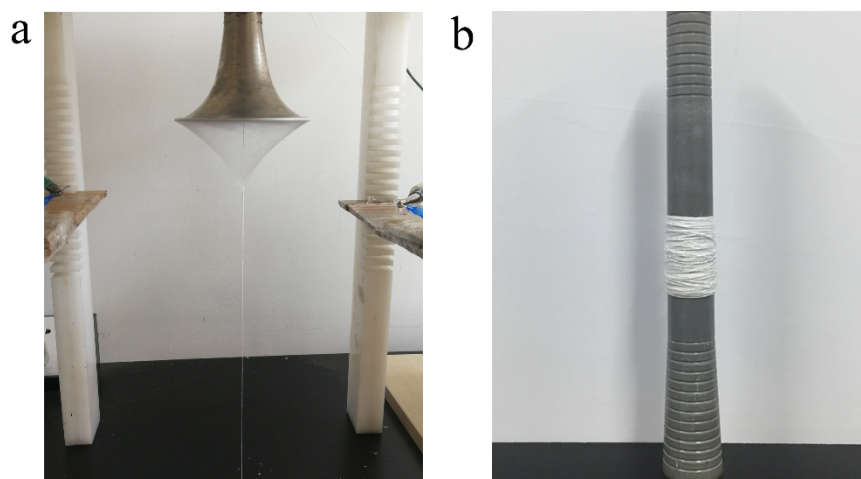

**Figure S1.** (a) Electrospinning process diagram of nanofiber core yarn, (b) PAN nanofiber core-spun yarn diagram.

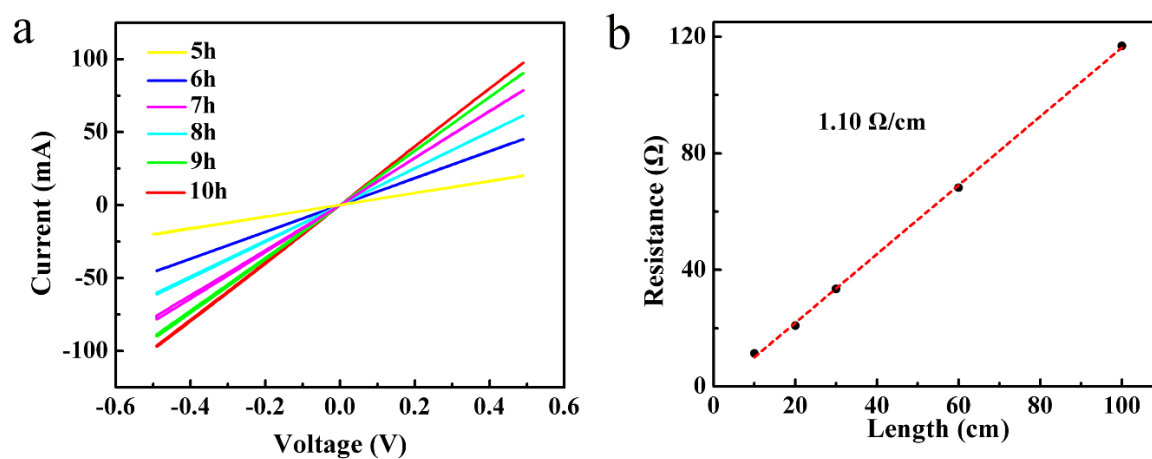

**Figure S2.** (a) I-V curves of 5 cm long nickel-coated yarns with different nickel coating times. (b) Variations of resistance of nickel-coated cotton yarns with lengths.

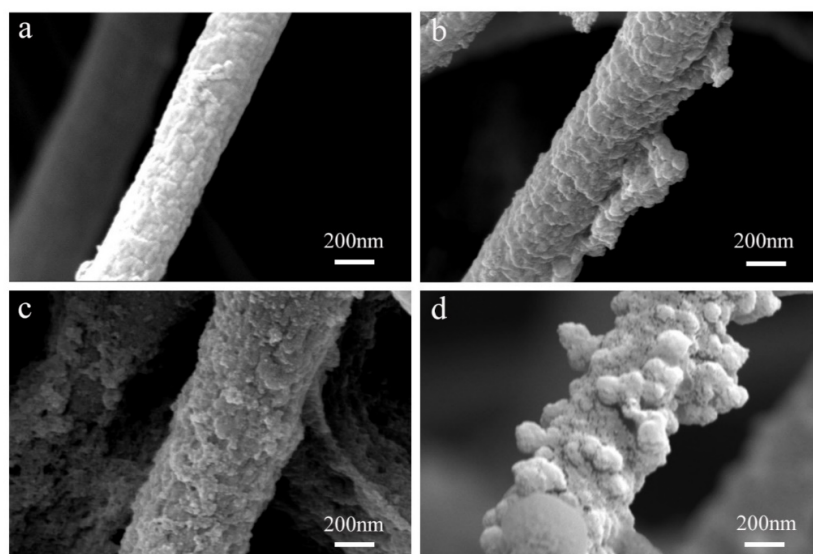

**Figure S3.** (a) Electron micrographs of single nanofibers of PNF/NiC-6, (b) PNF/NiC-12, (c) PNF/NiC-48, (d) PNF/NiC-72.

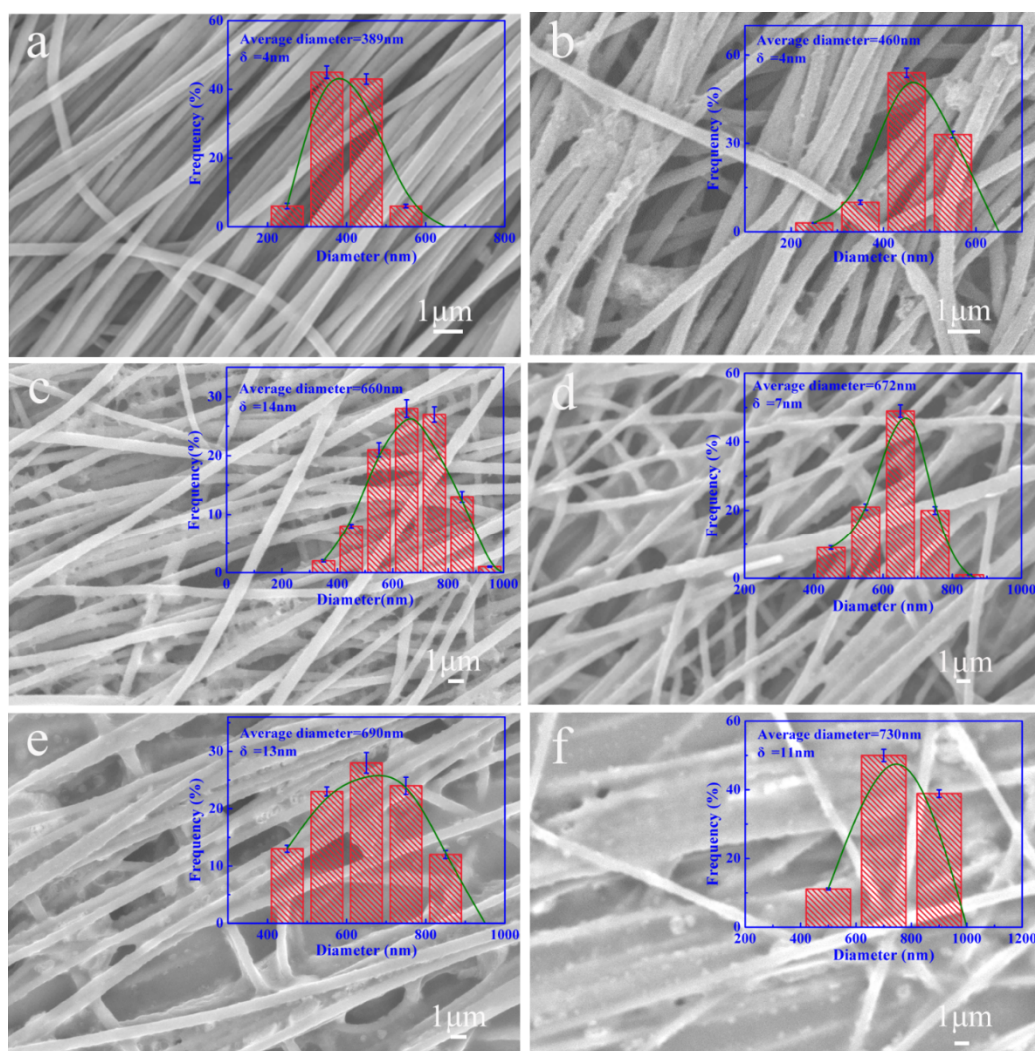

**Figure S4.** SEM graph and diameter distribution histogram of (a) PAN, (b) PNF/NiC-6, (c) PNF/NiC-12, (d) PNF/NiC-24, (e) PNF/NiC-48, (f) PNF/NiC-72 compound material.

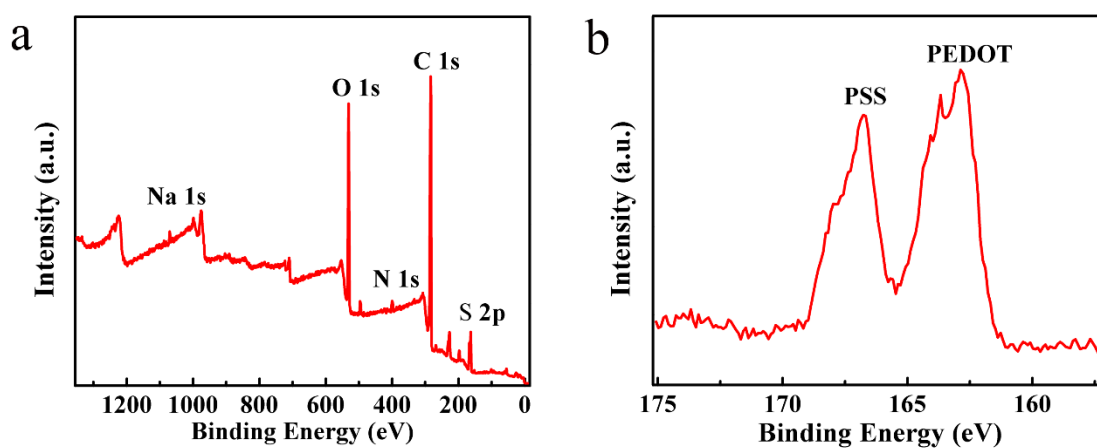

**Figure S5.** XPS spectrum of PNF/NiC composite cotton yarn (a), XPS spectrum of S 2p (b).

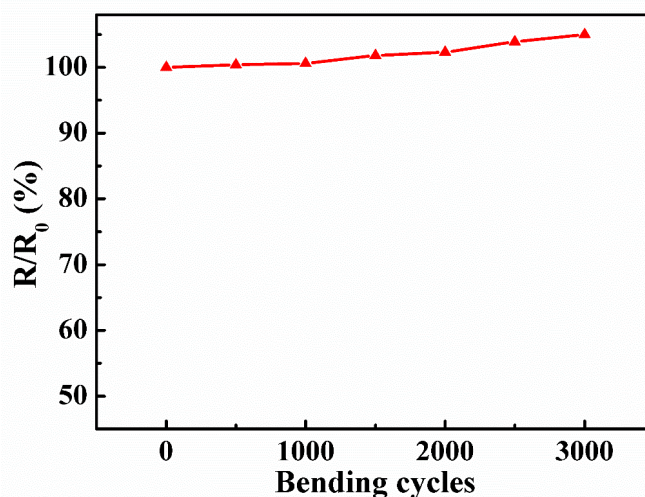

Figure S6. Resistance increase of Ni-coated cotton yarn after 3000 bending cycles.

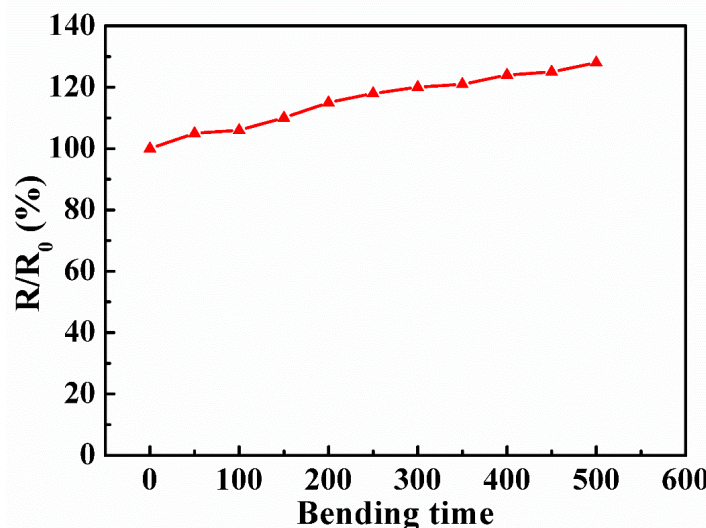

Figure S7. Bending curves of 500 cycles of PNF/NiC-24 composite yarns.

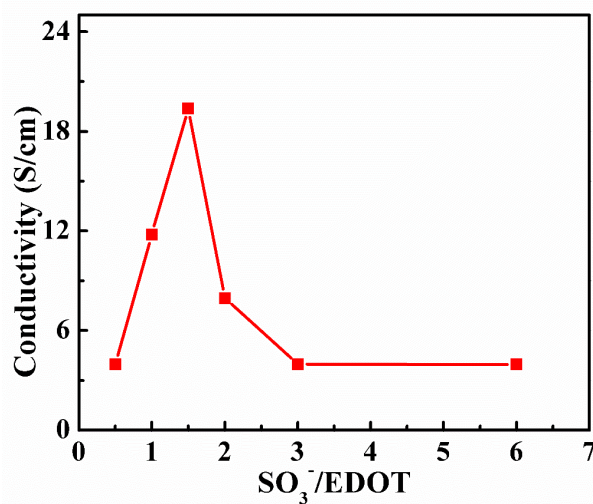

Figure S8. Conductivity curves of PNF/NiC-24 composite yarns with different mole ratios (mol:mol) of PEDOT and PSS.



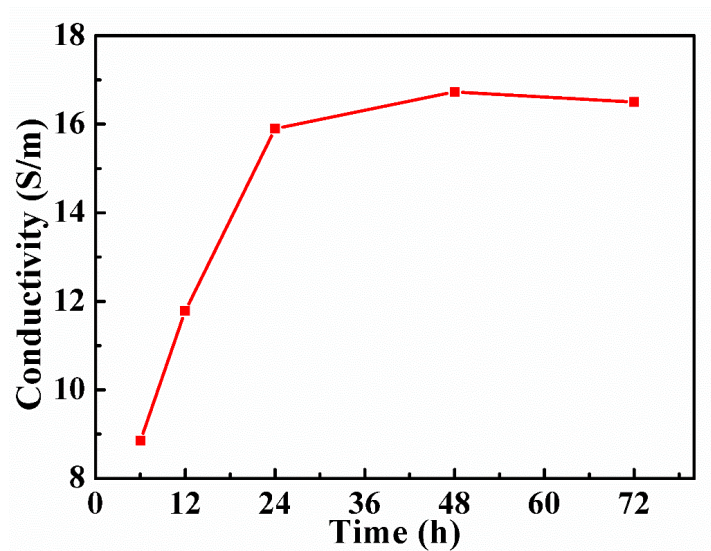

Figure S9. Conductivity curves of different deposition time for PAN nanofiber core-spun yarns.

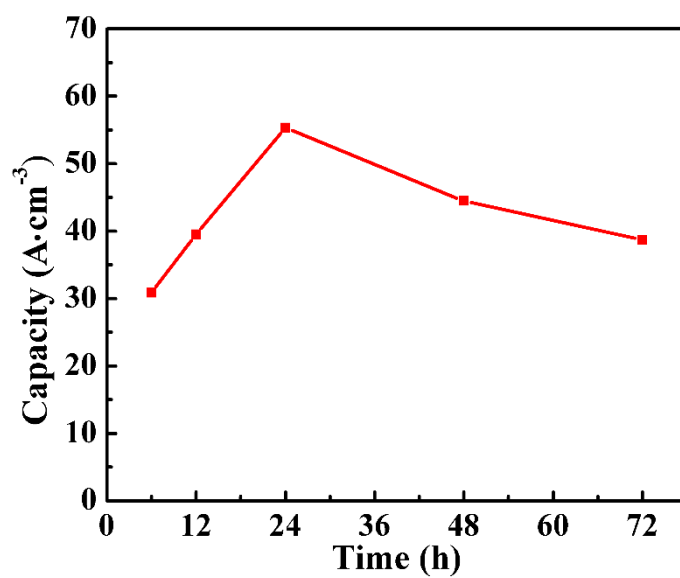

Figure S10. Volumetric capacity curve after in-situ deposition of PEDOT: PSS for different hours.

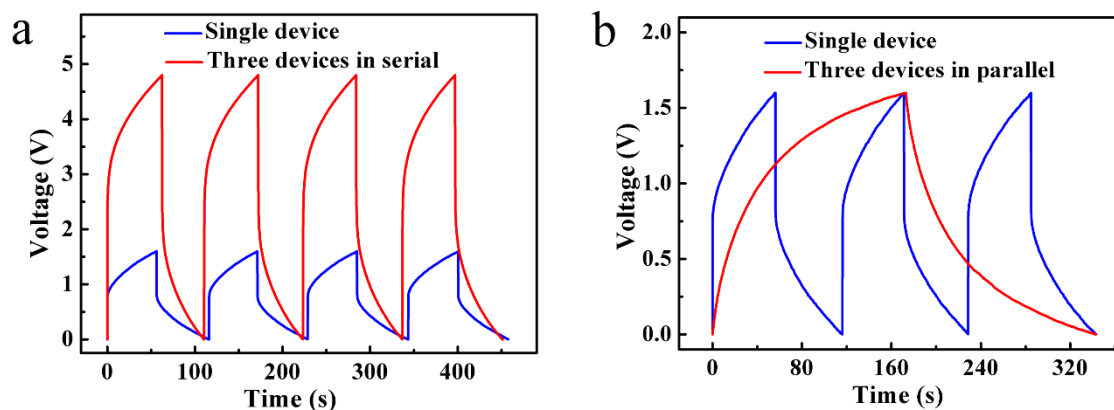

Figure S11. Galvanostatic charge and discharge curves of three SC yarns in series (a) and parallel (b).

### Supplementary Tables

Table S1. Nitrogen absorption and desorption data for different stage's materials.

|                     | Surface area(m <sup>2</sup> ·g <sup>-1</sup> ) | Pore volume(cm <sup>3</sup> ·g <sup>-1</sup> ) | Pore size(nm) |
|---------------------|------------------------------------------------|------------------------------------------------|---------------|
| Ni-coated yarns     | 1.755                                          | 0.002                                          | 1~50          |
| PAN/Ni-coated yarns | 3.549                                          | 0.012                                          | 1~50          |
| PNF/NiC-6           | 4.543                                          | 0.003                                          | 1~50          |
| PNF/NiC-12          | 5.180                                          | 0.004                                          | 1~50          |
| PNF/NiC-24          | 5.329                                          | 0.018                                          | 1~50          |
| PNF/NiC-48          | 2.089                                          | 0.001                                          | 1~50          |
| PNF/NiC-72          | 0.893                                          | 0.001                                          | 1~50          |

Table S2. Specific capacitance of yarn electrode material deposited PEDOT: PSS for different hours.

| Deposition time(h)                           | 6     | 12    | 24    | 48    | 72    |
|----------------------------------------------|-------|-------|-------|-------|-------|
| Volumetric capacitance (F·cm <sup>-3</sup> ) | 30.88 | 39.52 | 55.36 | 44.48 | 38.72 |

Table S3. Migration resistance of capacitors for different deposition time of PEDOT: PSS.

| Deposition time(h) | 6  | 12 | 24 | 48 | 72 |
|--------------------|----|----|----|----|----|
| Resistance(Ω)      | 76 | 43 | 16 | 47 | 64 |

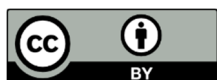

Supplement: materials-12-00273-s001.pdf [file materials-12-00273-s001.pdf]
